# Supplementary material
Source: HighWire-hosted journal article supplement (https://www.jswconline.org/highwire/filestream/6206/field_highwire_adjunct_files/0/JSWC_00011_Supplemental.docx)
Supplement: JSWC_00011_Supplemental.docx [file JSWC_00011_Supplemental.docx]

Zhang, Y., J. Wood, R. Bhattarai, and B. Faucette. 2022. Field evaluation of sediment perimeter barrier products under sheet flow conditions. Journal of Soil and Water Conservation 77(6):579-588. https://doi.org/10.2489/jswc.2022.00011.


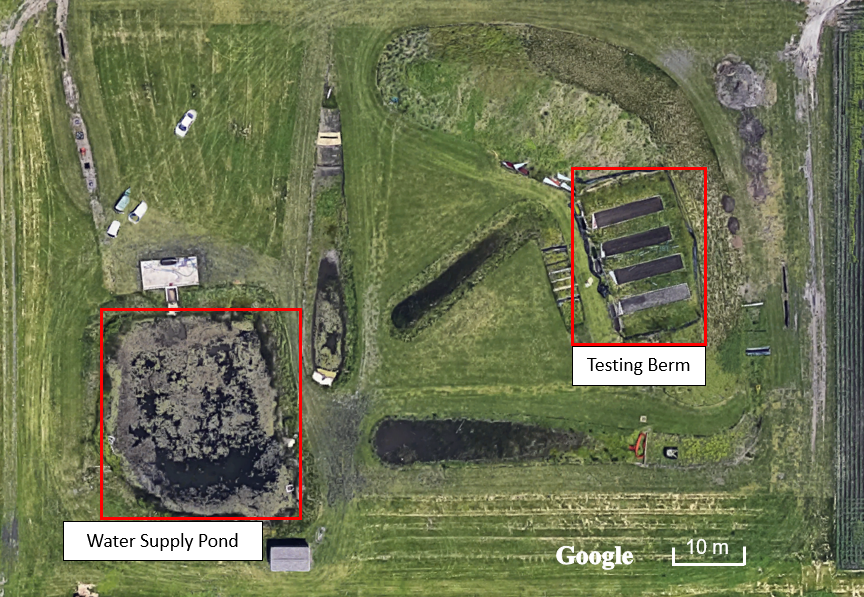


**Figure S1**. ECRTC testing facility


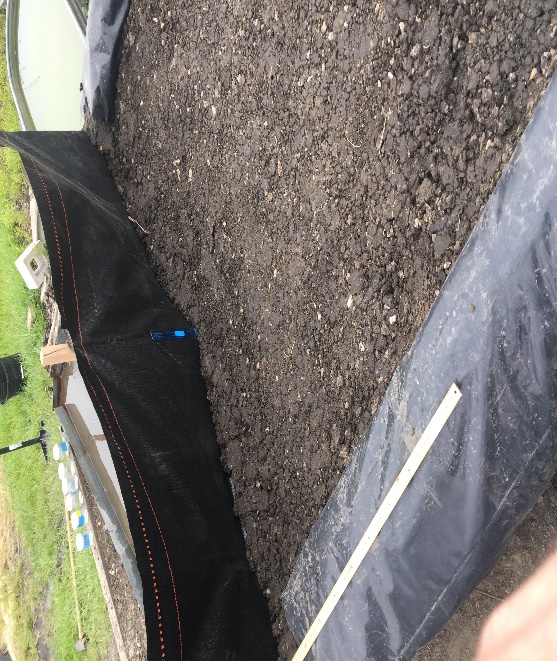


**Figure S2**. Silt fence


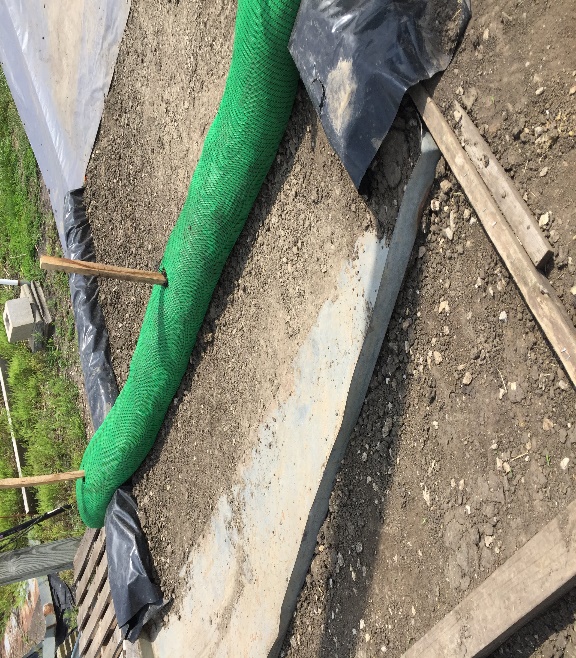


**Figure S3**. Filtrexx Siltsoxx


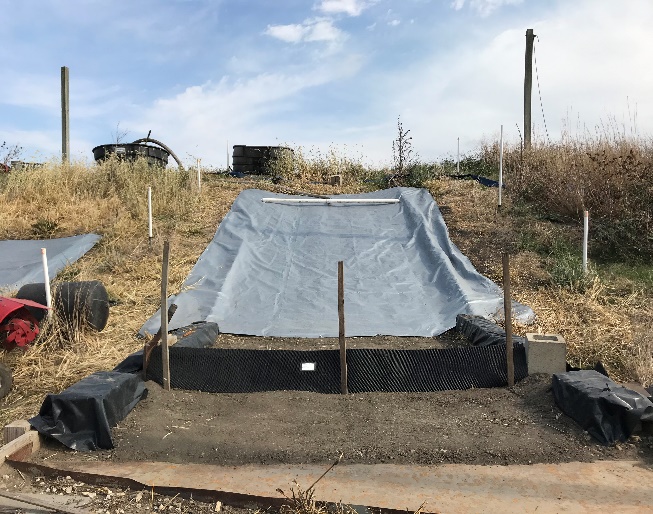


**Figure S4**. ERTEC ProWattle


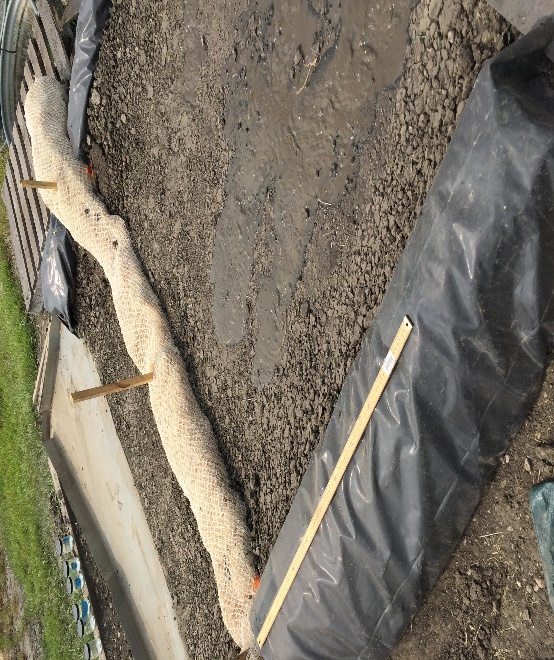


**Figure S5**. Sediment log


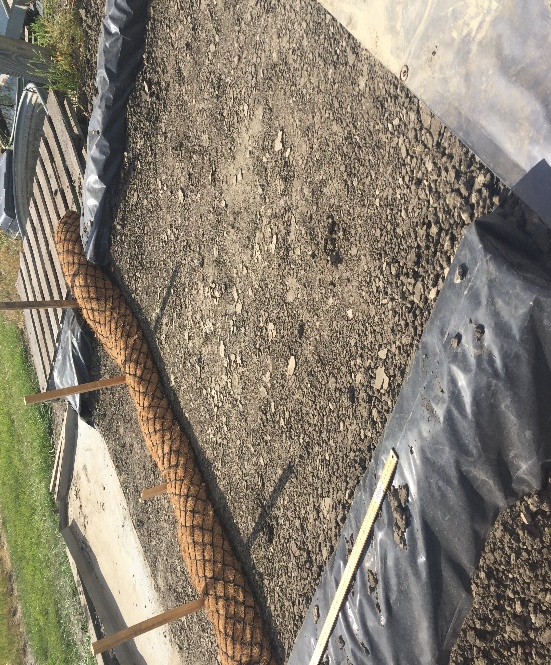


**Figure S6**. Coconut coir log
